# Supplementary material for: A Second Gamma-Glutamylpolyamine Synthetase, GlnA2, Is Involved in Polyamine Catabolism in Streptomyces coelicolor
Source: MDPI journal article supplement (doi:10.3390/ijms23073752), 2022-03-29
Supplement: s1 [file s1]

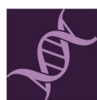

## Supplementary Materials

|         |                                                               |     |
|---------|---------------------------------------------------------------|-----|
| GlnAst  | -----SAEHLVTLNEHEVKFVDLRFTDTKGKEQHVITPAHQVNAEFF--             | 43  |
| GlnAsc  | -----MFQNADDVKKFIADVDVKFVDVRFCDLPGVMQHFITLPATAFDPD--          | 44  |
| GlnA2sc | -----MDKQQEFVIRTLEERDIRFVRLWFTDVLGFLKSVAVAPAELE-QAF-          | 45  |
| GlnA3sc | MSESDPVPGGRPGEVERATALSGETLGQGVHGVVLAYVDTAGIARVKTVPATAAAAAW    | 60  |
| GlnAst  | EEG--KMF---DGSISIGW--KGINESDMVLPDASTAVIDPFFADST--LIIRCDILE    | 93  |
| GlnAsc  | -AE--QAF---DGSISIRGF--QAIHESDMSLRPDLSTARVDPFRRDKT--LNINFFIHD  | 93  |
| GlnA2sc | DEG--IGF---DGSISIEGF--ARVYESDMIAPKDPSTFQVLPWRAEAPGTARMFCDILM  | 97  |
| GlnA3sc | GVGMSPVFDTFLLADDISIVGTDVLGSPDGLRLYPDLRLTMLA---A-----          | 104 |
| GlnAst  | PGTLQGYDRDPRSIKRAEDYLRTATGIADTVLFGPEEFFLFDDIRFGASISGSHVAIDD   | 153 |
| GlnAsc  | PITGEQYSRDPNRVAKKAEAYLASTGIADTAFFGPEAEFYVFDVSRFATRENESFYHIDS  | 153 |
| GlnA2sc | PDGSPSF-ADPRYVLKRALR--TSDLGFTFYTHPEIEFFLLKDKPVDGS-----        | 144 |
| GlnA3sc | ---QPGWAWAPVD-----RITQEGAPHPACGRVTLRRIIVAGAAERHGITFRAA        | 149 |
| GlnAst  | IEGAWNSTKYEGGNKGHRPGVKGGYFPVPPVDSAQDIRSEMCLVMEQGLVVEAHHEV     | 213 |
| GlnAsc  | EAGAWNTEGAL--EDNRGYKVRKGGYFPVPPVDHFADLRAEISLEERSGLQVERQHHEV   | 211 |
| GlnA2sc | -----VPTPADNSGYFDHTPQNIQMDFRQAITMLESIGISVEFSHHE-              | 187 |
| GlnA3sc | VEVEWVVGGRD-AGGDAFVPAVSGPAVGAARQVELSDCAADLLAALAAQGVQVDFHPE-   | 207 |
| GlnAst  | ATAGQNEVATRENTMTKKADEIQIKYVVHNVVHVRFGKTATFMPKPMFGDNGSGMHCHMS  | 273 |
| GlnAsc  | GTAGQAEINRYKNTLLAAADDLQFKYIVKNVAVKNGKTATFMPKPIFGDNGSGMHVHQS   | 271 |
| GlnA2sc | GAPGQQEIDRLYADALSTADNVMTFRLVMKQVALEQGLQATFMPKPFSEYPGSGMHTHLS  | 247 |
| GlnA3sc | YAAQGFESVSGALGPVAAADHSLVLRQTIRAVSARHGLRVSFAPAVLGQVGNNGHLHLS   | 267 |
| GlnAst  | LAKNGTNLF-SGDKYAGLSEQALYYIGGVVIAKAKAINALANPTTNSYKRLVPG-----   | 325 |
| GlnAsc  | LWSGGELFYDEQGYAGLSDTARYYIGGILKHAPSLLAFTNPTVNSYHRLVPG-----     | 324 |
| GlnA2sc | LFEGDRNAFYESGAEYQLSKVGRSFIAGLLRHAAEISAVTNQWVNSYKRIWGGTERTAGA  | 307 |
| GlnA3sc | AWRDGTLNHAGGTARCGMTAEESFVAGVLGHLPALALTAPSPASRLRLRPS-----      | 320 |
| GlnAst  | -YEAPVMLAYSARNRSASIRIPVVA-S--PKARRIEVRFPDPAANPYLCFAALLMAGLDG  | 381 |
| GlnAsc  | -FEAPVNLVYSQRNRSAAMRIPITGSN--PKAKRVEFRAPDASGNPYLAFSALLLAGLDG  | 381 |
| GlnA2sc | GGEAPSYICWGHNNRSALVRVPMYKPG-KTGSARVEVRSIDSGANPYLTYAVLLAAGLK   | 366 |
| GlnA3sc | -QWAGVFTAWGRETRAAALRIVGTAGIRDRAANLEVKPVDLAANPYLALASVIAAGLDG   | 379 |
| GlnAst  | IKNKIHGPEPMKNDLYDLPPEEAK--EIPQVAGSLEEALNALDLDRFLKA----GGVF    | 434 |
| GlnAsc  | IKNKIEPAEPIKDLIELAPEEHA--NVAQVPTSLGAVLDRLEADHEFLQ----GDVF     | 434 |
| GlnA2sc | IEEGYELPPGAEDDVWALSDAERRALGIEPLPQNLGEALALMERSDLVAETLGEHVDFDF  | 426 |
| GlnA3sc | LASSAPLPEEITGDPARLDPAARAAARGVRRLPVTLTESVAARFRTDGLREALGPVLADAV | 439 |
| GlnAst  | TDEAIDAYIALRREE-DDRVRMTPHPVEFELYYSV---                        | 468 |
| GlnAsc  | TPDLIETWIDFKRANEIAPLQLRPHPEFEMYFDV---                         | 469 |
| GlnA2sc | LRNKRQEWEEYRSQ-----VTAFELRKSLPVL                              | 453 |
| GlnA3sc | IAVRLGEAGSVEG-----LDDDGVAAYRWKY-----                          | 466 |

**Figure S1.** Identification of the conserved residues of *S. coelicolor* GlnA<sub>st</sub>, GlnA2<sub>st</sub> and GlnA3<sub>st</sub> proteins. GlnA<sub>st</sub> represents to the GS protein sequence from *S. typhimurium*. Conserved amino acids representing the consensus motif of GlnA<sub>st</sub> and GlnA<sub>sc</sub> are marked in orange, while alternatives in GlnA2 and GlnA3 in red.

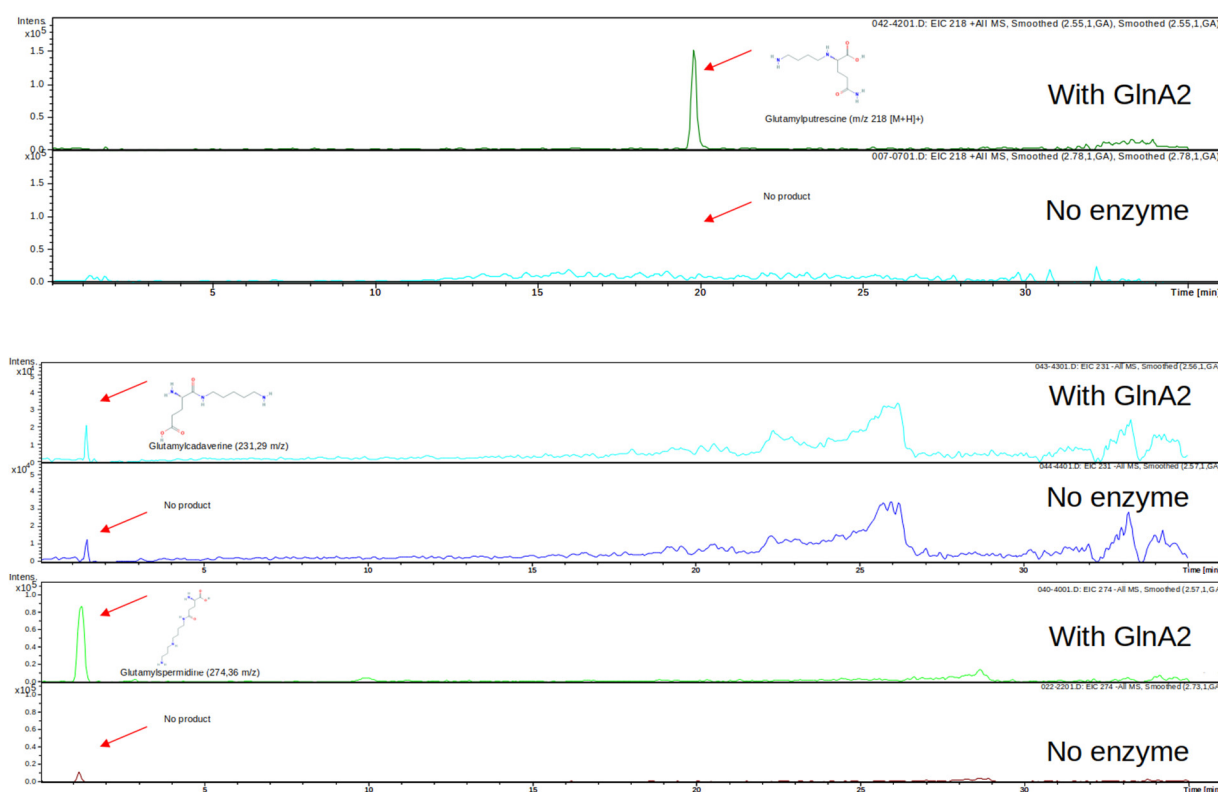

**Figure S2.** HPLC/ESI-MS analysis of the glutamylated reaction product generated by GlnA2 in an *in vitro* assay (full chromatogramm): top for gamma-glutamylputrescine; middle for gamma-glutamylcadaverine; bottom for gamma-glutamylspermidine. Two samples were analyzed in the MS positive mode (EIC – extracted ion chromatogram): on each chromatogramm reaction mixtures correspond to samples without addition of GlnA2 (below) and with addition of GlnA2 (above). Extracted ion chromatograms for the GlnA2 reaction product corresponding to gamma-glutamylputrescine, gamma-glutamylcadaverine and gamma-glutamylspermidine with charge to mass ratio of 218 m/z, 231 m/z and 274 m/z, respectively, are shown.

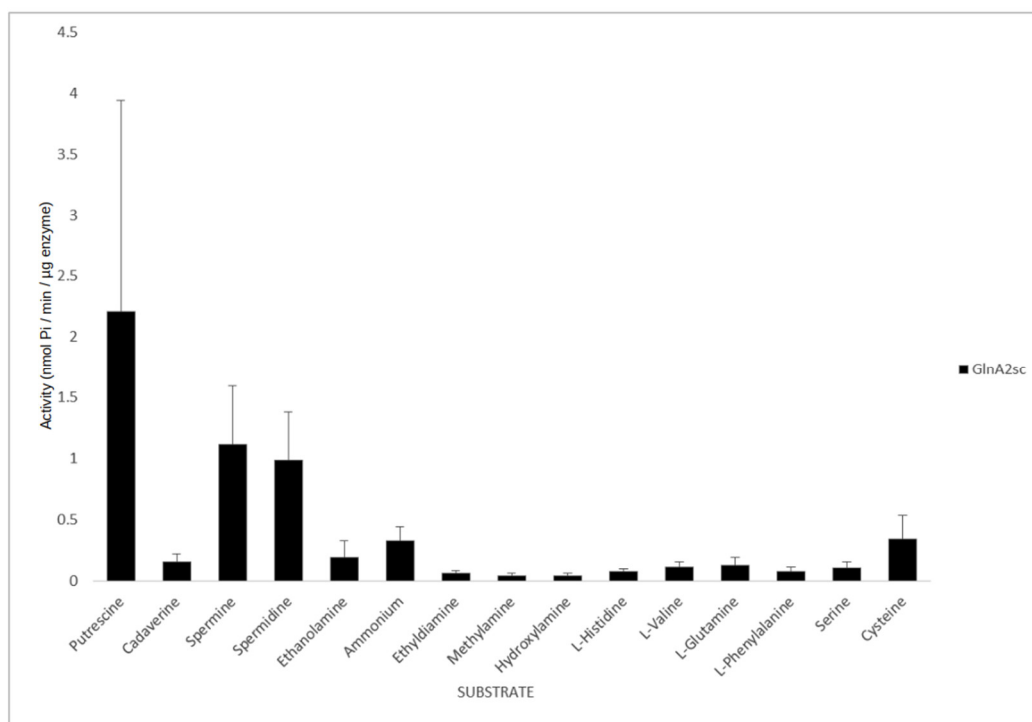

**Figure S3.** Effect of different nitrogen containing substrates on the activity of GlnA2. All substrates were at a concentration of 50 mM. The mean value of  $n = 6$  biological replicates from different cultures with  $n = 3$  technical replicates each with standard error is shown.

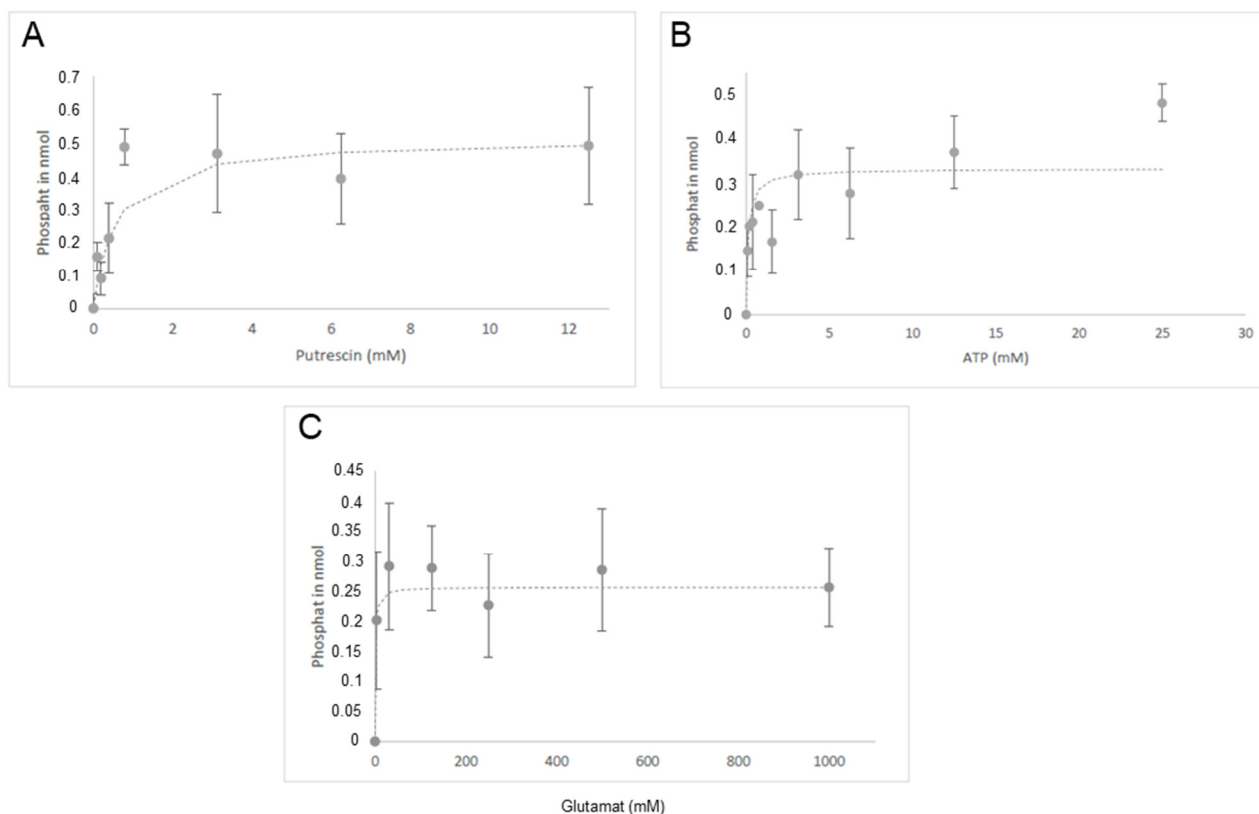

**Figure S4.** Activity of GlnA2 with different concentrations of putrescine (A), ATP (B), and glutamate (C) as well as in the presence of MSO (D). A nonlinear regression (solid black line, A,B,C) was made using a least-squares fit of  $n = 3$  data sets (grey bullets) and assuming the Michaelis-Menten model.

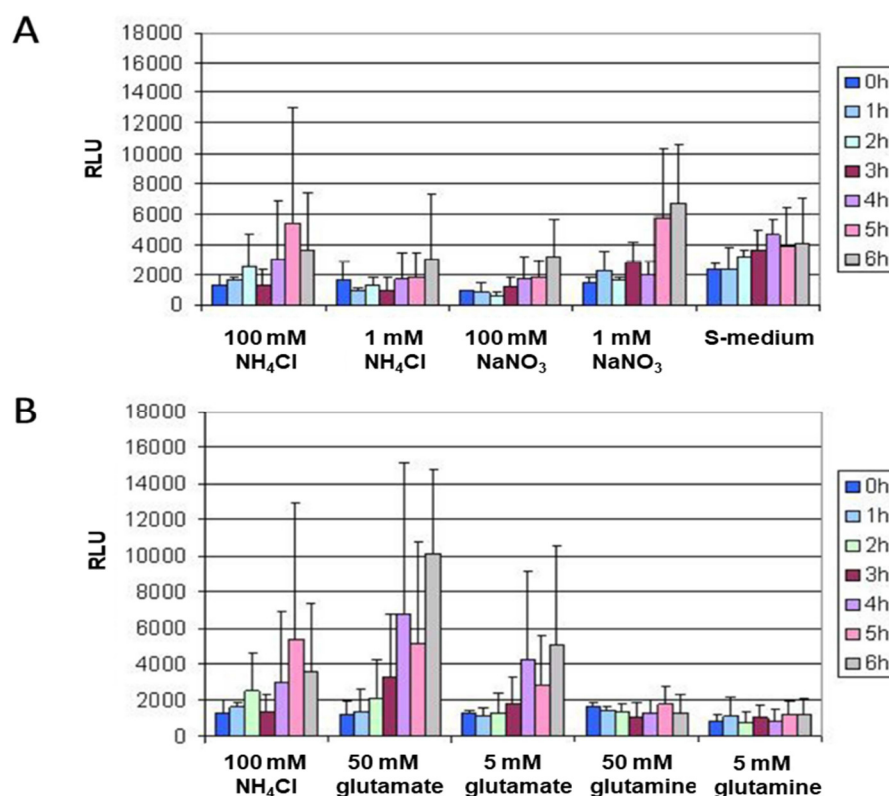

**Figure S5.** Luciferase-based reporter gene analysis in *S. coelicolor* M145 under different nitrogen conditions. The promoterless genes *luxAB* were integrated under the control of the *glnA2* promoter in the *S. coelicolor* M145 genome. The cells were incubated in a pre-culture complex S-medium, transferred to the main-culture defined Evans medium with respective nitrogen sources, gathered and were shaking for 6 hours in a 96well plate. Samples were controlled every hour. The luminescence expressed as relative light unit (RLU) after incubation in (A) S-medium and Evans medium with 1 mM or 100 mM  $\text{NH}_4\text{Cl}$  or  $\text{NaNO}_3$  and (B) 5 mM or 50 mM glutamate or glutamine were determined.

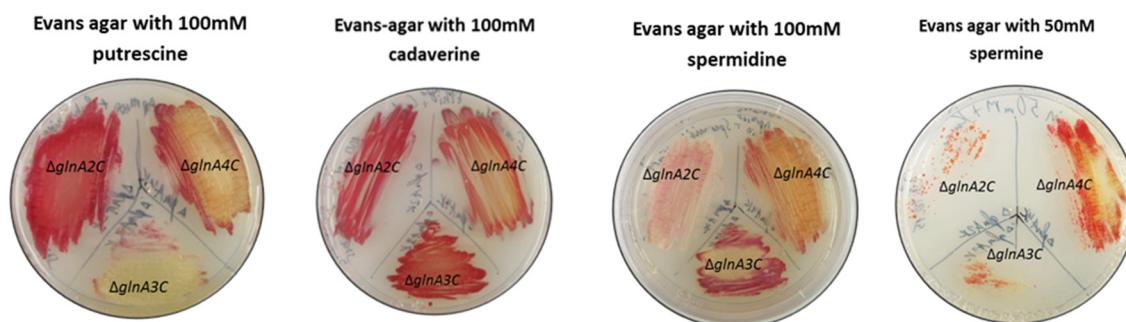

**Figure S6.** Phenotypic analysis of the parental strain and the complemented *glnA2* ( $\Delta\text{glnA2C}$ ), *glnA3* ( $\Delta\text{glnA3C}$ ) and *glnA4* ( $\Delta\text{glnA4C}$ ) mutants on defined Evans-agar supplemented with polyamines.

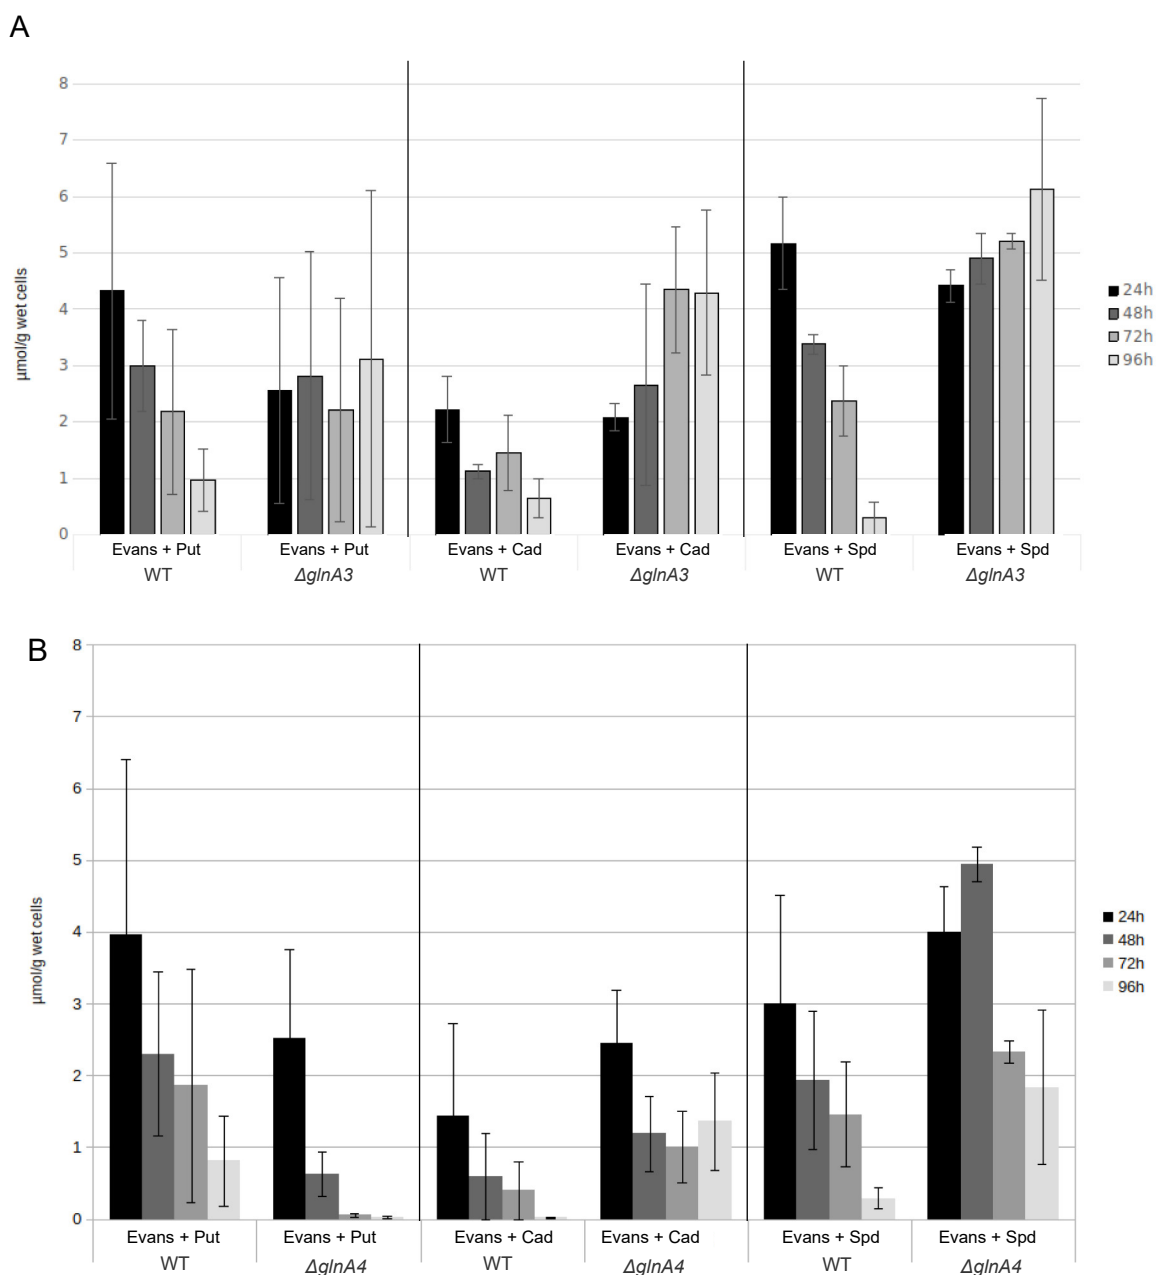

**Figure S7.** Intracellular polyamine concentration in *S. coelicolor* strains. The polyamine level of the parental strain *S. coelicolor* M145 (WT) and the  $\Delta glnA3$  mutant (**A**) or the  $\Delta glnA4$  mutant (**B**) was monitored in samples taken after 24, 48, 72 and 96 h of cultivation in defined Evans medium supplemented with polyamines (Put – putrescine; Cad – cadaverine or Spd – spermidine, 25 mM of each) as a sole nitrogen source. The mean value of three biological replicates was calculated in  $\mu\text{mol}$  per 1 g of wet cells. Error bars indicate standard error of tree (**A**) or two (**B**) biological replicates.

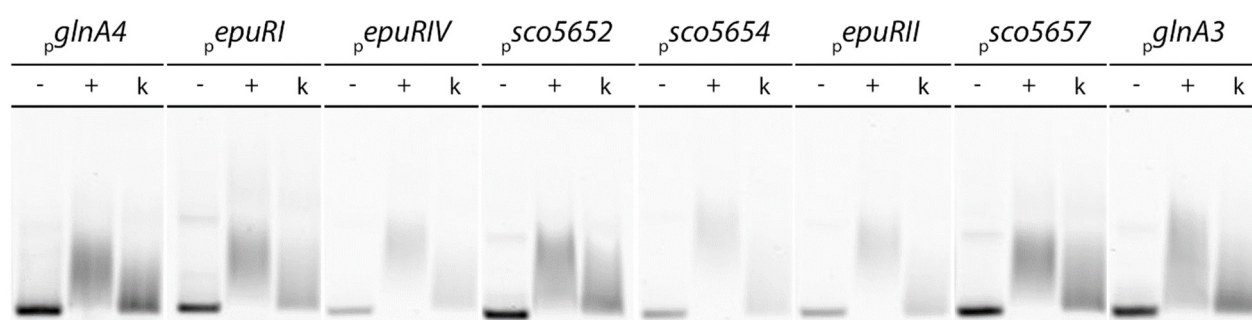

**Figure S8.** Band shift assays performed with EpuRI. 1 ng fluorescence-labeled promoter regions of polyamine associated genes were incubated without (-) or with (+) 2  $\mu$ g His-EpuRI. As a control 1000-fold amount of specific unlabeled DNA fragments (K) was added.

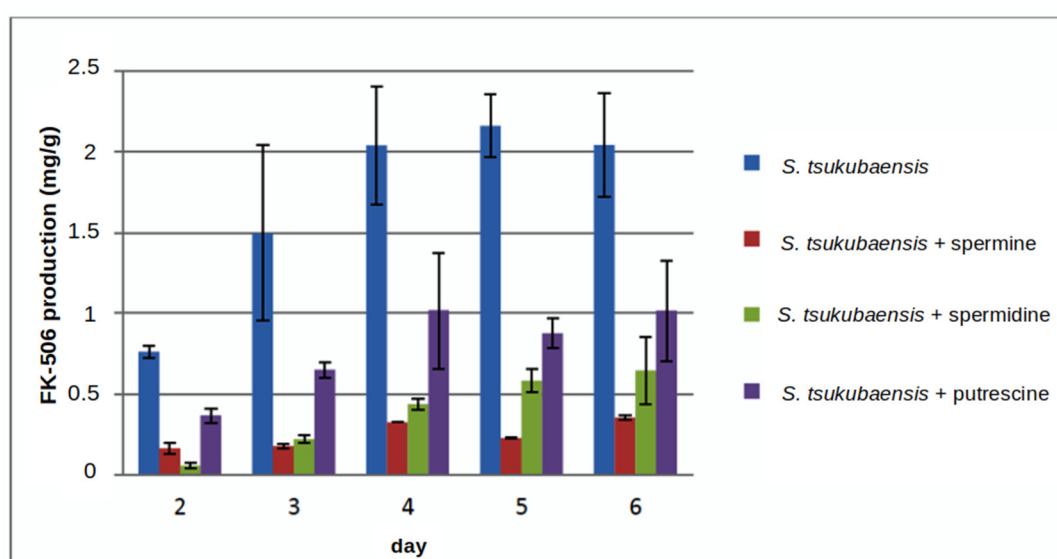

**Figure S9.** FK-506 production test and biomass estimation in *S. tsukubaensis*. The wild type has been incubated in MG medium with external addition of polyamines putrescine, spermidine or spermine. The specific FK-506 yield in mg / g at the various times (day 2 to day 6) with standard deviation is plotted in the bar diagram.

**Table S1.** RNAseq analysis results combined as a list with the selection of *S. coelicolor* genes with increased expression in the presence of polyamines compared to the culture with ammonium. Data are expressed as log change of expression compared to the control with ammonium.

| Gene    | Function                                                           | Cadaverine | Putrescine | Spermidine | Spermine |
|---------|--------------------------------------------------------------------|------------|------------|------------|----------|
| SCO5584 | nitrogen regulatory protein P-II 1   (RefSeq) glnB                 | 4.83       | -          | -          | -        |
| SCO5679 | aldehyde dehydrogenase, aldehyde dehydrogenase (NAD <sup>+</sup> ) | 3.00       | 2.91       | 2.35       | -        |
| SCO4159 | transcriptional regulator GlnR                                     | 2.65       | -          | -          | -        |

**Table S2.** Oligonucleotides used in this study.

| Oligonucleotides   | Sequences 5'-3'                             | Reference |
|--------------------|---------------------------------------------|-----------|
| glnA2-pRSETB-C-Fw  | ACATATGGACAAGCAGCAGGAGTTC                   | This work |
| glnA2-pRSETB-C-Rev | AAGCTTCTAATGATGATGATGATGCAGCACCGG-CAGCGACTT | This work |
| glnA2-pRSETB-N-Fw  | ACCATGGAAGACAAGCAGCAGGAGTTC                 | This work |
| glnA2-pRSETB-N-Rev | AAAGCTTCTACAGCACCGGCAGCGA                   | This work |
| glnA2-up-fw        | AGCCAGTGGCGATAAGCCGTGAGGTCCGCTGATC          | This work |
| glnA2-up-rev       | AGCCAGTGGCGATAAGCATCTTCCGCTTCCCCAT          | This work |
| glnA3-up-fw        | AGCCAGTGGCGATAAGGCCGTCACCGTCATGGGC          | This work |
| glnA3-up-rev       | AGCCAGTGGCGATAAGCACGTGTCGGCTCCTTCG          | This work |
| glnA4-up-fw        | AGCCAGTGGCGATAAGCGCAGCGTGACGCGGCTG          | This work |
| glnA4-up-rev       | AGCCAGTGGCGATAAGCATAAGGTATTGCCGGGA          | This work |
| rt-hrdB-fw         | CAAGCTGGCGAACTCCGACAAG                      | This work |
| rt-hrdB-rev        | CAGGTGGCGTACGTGGAGAAC                       | This work |
| rt-glnA2-fw        | CGGCCAGCAGGAGATCGAC                         | This work |
| rt-glnA2-rev       | CAGGCCCCGCGATGAAGGAG                        | This work |
| glnA2-del-AB'-Fw   | GGGAATTCACCTCACGCACGCCGTCT                  | This work |
| glnA2-del-AB'-Rev  | CCAGATCTCATCTTCCGCTTCCCCAT                  | This work |
| glnA2-del-BC-Fw    | GGGGATCCTAGGGCGGCTGTGCCGGCCC                | This work |
| glnA2-del-BC-Rev   | AAAAGCTTCGTCTACGCCGTCGCCTTCA                | This work |
| glnA2-Apra-Mut-fw  | AGAATTCGACAGCACGATCGGGTCC                   | This work |
| glnA2-Apra-Mut-rev | AAGCTTTCGTAGCCCTCCTCGATGCC                  | This work |
| glnA2-150bp-up     | TGGCCTCTACGCTGCGGT                          | This work |

|                  |                                     |           |
|------------------|-------------------------------------|-----------|
| glnA2-150bp-down | AGAACCGGCCCCGAGGACT                 | This work |
| glnA2-350bp-int  | AGGTGAAGCCCAGGTCGGA                 | This work |
| glnA2-1000bp-int | CGAGGTCCGCTCCATCGA                  | This work |
| glnE-150bp-up    | TCCCTTCCTCGGCTGGTACA                | This work |
| glnE-150bp-down  | GACGGCGGAGGGTGTGGTTG                | This work |
| glnE-500bp-int   | GCGGTCTCGGCGACGTCGAT                | This work |
| glnE-2500bp-int  | TGATCGACCCCCTGCGCTAC                | This work |
| glnE-up-fw       | AGCCAGTGGCGATAAGACCGGGCGTGGTCCTCG   | This work |
| glnE-up-rev      | AGCCAGTGGCGATAAGCATCTCGGCCTCCTGTCG  | This work |
| lux-glnA2-fw     | AGGATCCGTCCCGGCCCGATCCCCG           | This work |
| lux-glnA2-rev    | ATCTAGAATGTCGCGCTCCTCCAGC           | This work |
| 5652EMSAf        | AGCCAGTGGCGATAAGCACCGGACGCCCTG      | This work |
| 5652EMSAr        | AGCCAGTGGCGATAAGCATGGGGCCTCTTCCGGT  | This work |
| 5654EMSAf        | AGCCAGTGGCGATAAGCAGATCCTGCGCGCCACG  | This work |
| 5654EMSAr        | AGCCAGTGGCGATAAGCATGGGCGTACACCTCGG  | This work |
| 5656EMSAf        | AGCCAGTGGCGATAAGTCCGTCCGTGCGGCGGTCC | This work |
| 5656EMSAr        | AGCCAGTGGCGATAAGCACGGCTTCACTGTGCACG | This work |
| 5657EMSAf        | AGCCAGTGGCGATAAGCGGCGTCCAACCTGGGGAC | This work |

|           |                                          |           |
|-----------|------------------------------------------|-----------|
| 5657EMSAr | AGCCAGTGGCGATAAGCACTGCCGGCCCTCCAAG       | This work |
| 5658EMSAf | AGCCAGTGGCGATAAGCTACGGCAAGGACCTGTCTG     | This work |
| 5658EMSAr | AGCCAGTGGCGATAAGCATGGCACGAGGATCCCGT      | This work |
| 5666EMSAf | AGCCAGTGGCGATAAGGCTGTCCCGCGCCTCCGGG      | This work |
| 5666EMSAr | AGCCAGTGGCGATAAGCATGTCTGGCTCTCCTCGGT     | This work |
| 5667EMSAf | AGCCAGTGGCGATAAGGGATACAAGGCGTCCGGGT      | This work |
| 5667EMSAr | AGCCAGTGGCGATAAGCATGGCGGCCACTTGGGC       | This work |
| 5676EMSAf | AGCCAGTGGCGATAAGCCTTGCCCCCTGACCTGCCG     | This work |
| 5676EMSAr | AGCCAGTGGCGATAAGCATGGGGGGCTCCTGGGG       | This work |
| 5977EMSAf | AGCCAGTGGCGATAAGCGGGCTCGACTCCCTGGA       | This work |
| 5977EMSAr | AGCCAGTGGCGATAAGCATTGCGGGTGGTGCTCGT      | This work |
| 6960EMSAf | AGCCAGTGGCGATAAGCCGAGTTCACACCTGG         | This work |
| 6960EMSAr | AGCCAGTGGCGATAAGCATCGCTTGATCATACTTTCAGCC | This work |
| 6963EMSAf | AGCCAGTGGCGATAAGCCGGCGGGTCCGGCCCCGT      | This work |
| 6963EMSAr | AGCCAGTGGCGATAAGCATCGCGGGATGCCTCCTG      | This work |
| 1614EMSAf | AGCCAGTGGCGATAAGTCGAGGAAGAACCGGGCG       | This work |
| 1614EMSAr | AGCCAGTGGCGATAAGCACGCTCCCGGCACTCC        | This work |
| 1615EMSAf | AGCCAGTGGCGATAAGCCTGAACGACCTGCTGG        | This work |

---

|            |                                      |           |
|------------|--------------------------------------|-----------|
| 1615EMSAr  | AGCCAGTGGCGATAAGCATCCGTCCTCCAGGTGA   | This work |
| EMSA1616F  | AGCCAGTGGCGATAAGTACCAGTTGGGCCCCGAGAT | This work |
| EMSA1616R  | AGCCAGTGGCGATAAGCTGCCCATAACCCCAGCTT  | This work |
| EMSA1617F  | AGCCAGTGGCGATAAGCTGCCCATAACCCCAGCTT  | This work |
| EMSA1617R  | AGCCAGTGGCGATAAGTACCAGTTGGGCCCCGAGAT | This work |
| EMSA1619F2 | AGCCAGTGGCGATAAGAAGGCCATCCGCGCCTTGAA | This work |
| EMSA1619R2 | AGCCAGTGGCGATAAGTTTGTGGTCGCCCATCGCT  | This work |

---
